# Supplementary material
Source: PubMed Central journal article supplement (PMC7871321)
Supplement: am0c16253_si_001.pdf [file am0c16253_si_001.pdf]

## Supporting information:

### **SrTiO<sub>3</sub>/Bi<sub>4</sub>Ti<sub>3</sub>O<sub>12</sub> Nanoheterostructural Platelets Synthesized by Topotactic Epitaxy as Effective Noble-Metal-Free Photocatalysts for pH-Neutral Hydrogen Evolution**

Marjeta Maček Kržmanc<sup>\*†</sup>, Nina Daneu<sup>†</sup>, Alja Čontala<sup>†‡</sup>, Saswati Santra<sup>†</sup>, Khaja Mohaideen Kamal<sup>#</sup>, Blaž Likozar<sup>#</sup> and Matjaž Spreitzer<sup>†</sup>

<sup>†</sup> Advanced Materials Department, Jožef Stefan Institute, Jamova cesta 39, 1000 Ljubljana, Slovenia

<sup>‡</sup> Jožef Stefan International Postgraduate School, Jamova cesta 39, 1000 Ljubljana, Slovenia

<sup>#</sup> Department of Catalysis and Chemical Reaction Engineering, National Institute of Chemistry, Hajdrihova 19, 1000 Ljubljana, Slovenia

#### **Corresponding author:**

**Marjeta Maček Kržmanc:** [marjeta.macek@ijs.si](mailto:marjeta.macek@ijs.si)

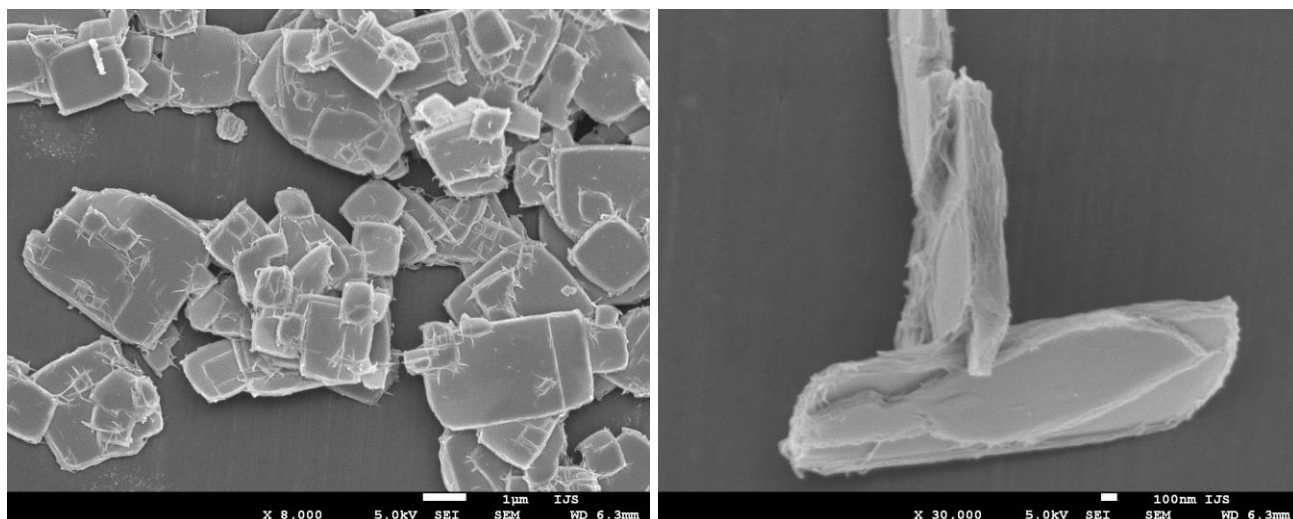

**Figure S1:** SEM micrographs of the  $\text{Bi}_4\text{Ti}_3\text{O}_{12}$  platelets after treatment in 6-M NaOH (in the absence of  $\text{Sr}^{2+}$  ions) at  $200^\circ\text{C}$  for 15 hours.

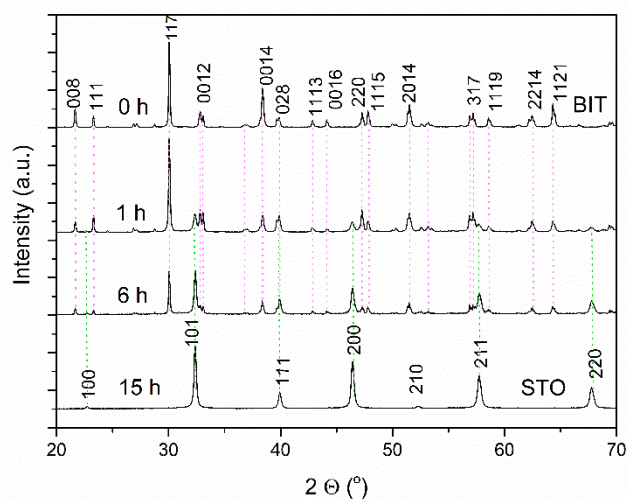

**Figure S2:** Powder XRD patterns of the of the  $\text{HNO}_3$ -washed platelets after different times of TC reaction ( $200^\circ\text{C}$ , 6-M NaOH,  $\text{Sr}/\text{Ti}=12$ ). The STO and BIT abbreviations stand for  $\text{SrTiO}_3$  and  $\text{Bi}_4\text{Ti}_3\text{O}_{12}$ , respectively.

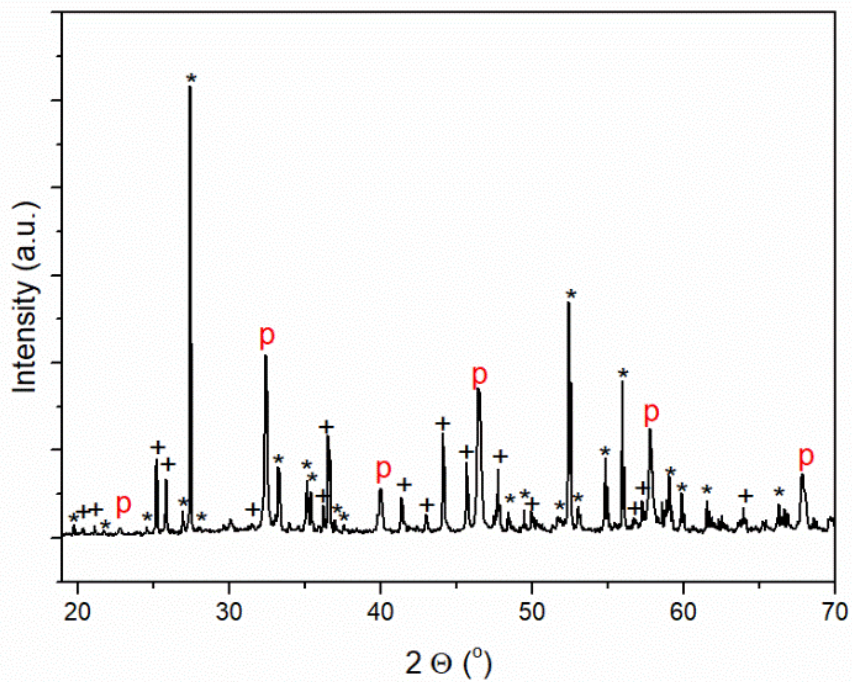

**Figure S3:** XRD pattern of the water-washed reaction product, obtained at Sr/Ti=12, 200°C/15 hours, 6-M NaOH: p⇒SrTiO<sub>3</sub> perovskite, \*⇒Bi<sub>2</sub>O<sub>3</sub>, +⇒SrCO<sub>3</sub>.

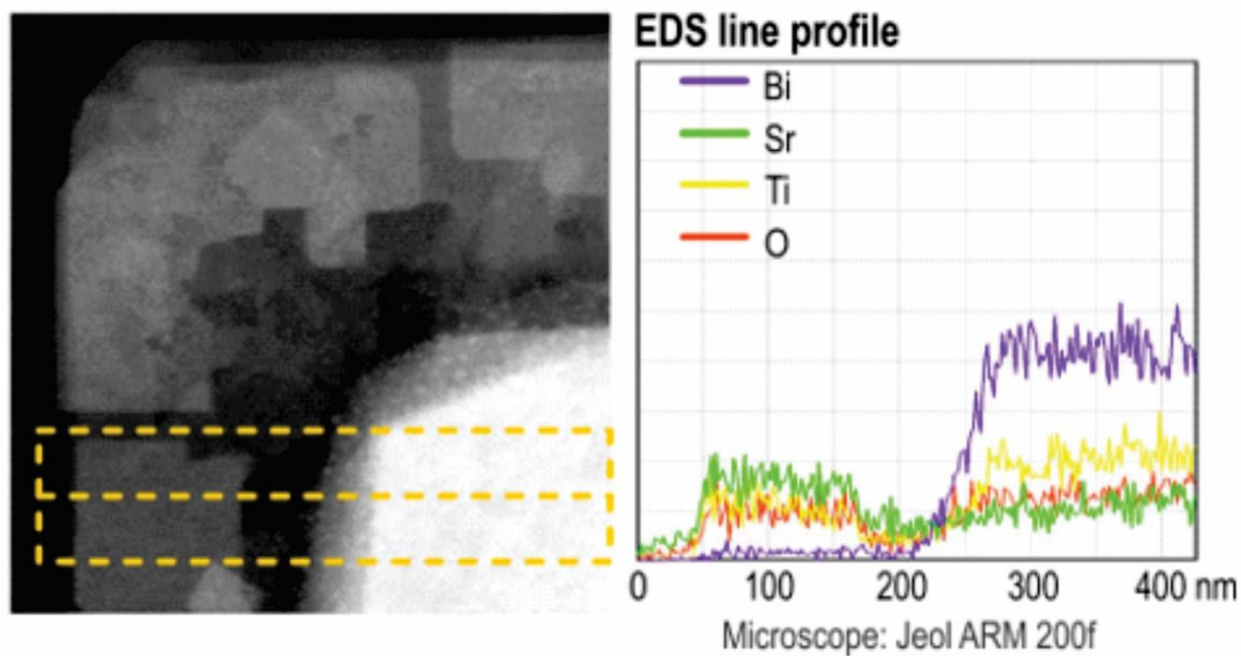

**Figure S4:** STEM (DF with EDS line profile) of SrTiO<sub>3</sub>/Bi<sub>4</sub>Ti<sub>3</sub>O<sub>12</sub> heterostructural platelet formed after 1 hour at 200°C at Sr/Ti=12 and 6-M NaOH.

Theoretical calculation of platelet-thickness difference during transformation of pre-existing  $\text{Bi}_4\text{Ti}_3\text{O}_{12}$  (BIT) platelets to  $\text{SrTiO}_3$  (STO) platelets, assuming a constant length and width of the platelets:

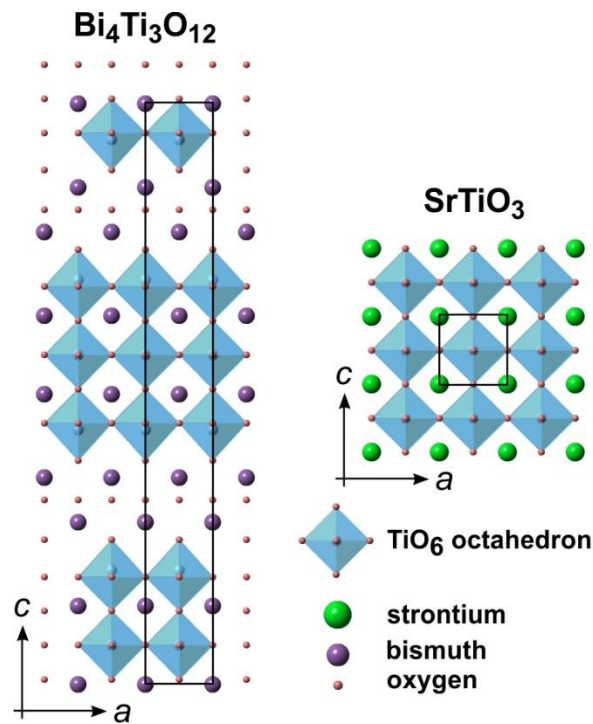

**Figure S5:** Structural models of  $\text{Bi}_4\text{Ti}_3\text{O}_{12}$  and  $\text{SrTiO}_3$

$$c_{\text{BIT}} = 3.2882 \text{ nm}$$

$$c_{\text{STO}} = 0.3905 \text{ nm}$$

One BIT unit cell contains 6  $\text{TiO}_6$  octahedra along the c-direction. Theoretically, these convert to  $\text{TiO}_6$  octahedra in the newly formed STO, where the unit cell extends across one  $\text{TiO}_6$  octahedron.

$$1 c_{\text{BIT}} \rightarrow 6 c_{\text{STO}}$$

$$c_{\text{BIT}} = 3.2882 \text{ nm}$$

$$c_{\text{STO}} = 0.3905 \text{ nm}; 6 \cdot c_{\text{STO}} = 2.343 \text{ nm}$$

$$(6 \cdot c_{\text{STO}} / c_{\text{BIT}}) \cdot 100 = 71.25 \%$$

The calculation indicates that a BIT platelet with an average thickness of  $\sim 60 \text{ nm}$  would transform into an STO platelet with a thickness of  $\sim 42 \text{ nm}$ .

**Table S1:** H<sub>2</sub>-evolution rates ( $\mu\text{mol g}^{-1}\cdot\text{h}^{-1}$ ) of Bi<sub>4</sub>Ti<sub>3</sub>O<sub>12</sub>, SrTiO<sub>3</sub>/Bi<sub>4</sub>Ti<sub>3</sub>O<sub>12</sub> and SrTiO<sub>3</sub> platelets and commercial SrTiO<sub>3</sub> nanopowders (Figure 6)

| Photocatalysts (synthesis time)                                                         | Composition-structure                                                       | Rate of H <sub>2</sub> evolution ( $\mu\text{mol g}^{-1}\cdot\text{h}^{-1}$ ) | BET ( $\text{m}^2\text{g}^{-1}$ ) |
|-----------------------------------------------------------------------------------------|-----------------------------------------------------------------------------|-------------------------------------------------------------------------------|-----------------------------------|
| Bi <sub>4</sub> Ti <sub>3</sub> O <sub>12</sub> platelets (0 hour)                      | Bi <sub>4</sub> Ti <sub>3</sub> O <sub>12</sub>                             | 7.5                                                                           | 2–3                               |
| SrTiO <sub>3</sub> /Bi <sub>4</sub> Ti <sub>3</sub> O <sub>12</sub> platelets (6 hours) | SrTiO <sub>3</sub> : Bi <sub>4</sub> Ti <sub>3</sub> O <sub>12</sub> =60:40 | 1265                                                                          | 20                                |
| SrTiO <sub>3</sub> platelets (15 hours)                                                 | SrTiO <sub>3</sub>                                                          | 65                                                                            | 10                                |
| SrTiO <sub>3</sub> commercial nanopowder                                                | SrTiO <sub>3</sub>                                                          | 81                                                                            | 24                                |

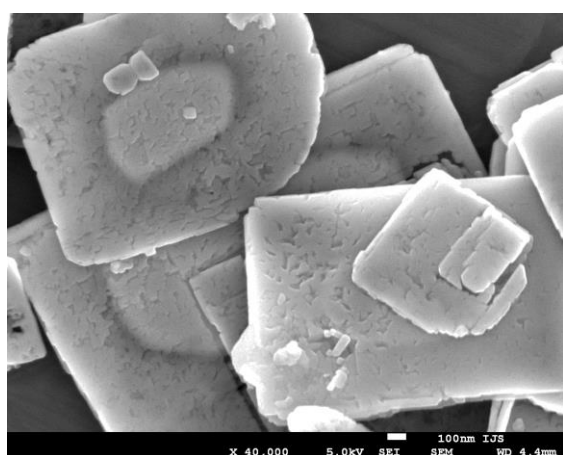

**Figure S6:** SEM micrograph of the SrTiO<sub>3</sub>/Bi<sub>4</sub>Ti<sub>3</sub>O<sub>12</sub> nanoheterostructural platelets obtained after 6 hours of reaction at 200°C (Sr/Ti=12, 6-M NaOH).

**Table S2:** Literature review of various photocatalysts, their H<sub>2</sub>-evolution rates and photocatalytic performance evaluation conditions

| Photocatalyst                                                                                      | H <sub>2</sub> evolution in $\mu\text{mol g}^{-1}\cdot\text{h}^{-1}$ (STH) <sup>a</sup> | Irradiation source                                               | Sacrificial agent | Reference        |
|----------------------------------------------------------------------------------------------------|-----------------------------------------------------------------------------------------|------------------------------------------------------------------|-------------------|------------------|
| <b>SrTiO<sub>3</sub>/Bi<sub>4</sub>Ti<sub>3</sub>O<sub>12</sub> nanoheterostructural platelets</b> | <b>1265 (0.19 %)</b>                                                                    | <b>300-W Xenon lamp with AM 1.5G</b>                             | <b>methanol</b>   | <b>This work</b> |
| Rh <sub>2-y</sub> Cr <sub>y</sub> O <sub>3</sub> /Al:SrTiO <sub>3</sub>                            | 530                                                                                     | 150-W Xenon lamp with Oriel Cornerstone 130 monochromator filter | Not used          | <sup>1</sup>     |
| Pt/ Single-Crystal-Like Porous SrTiO <sub>3</sub> Nanocube Assemblies                              | 202.6                                                                                   | 300-W Xenon lamp                                                 | methanol          | <sup>2</sup>     |
| Pt/ mesoporous-assembled SrTiO <sub>3</sub> nanocrystal                                            | 188                                                                                     | 300-W Xenon lamp with UV cut-off filter (>400 nm)                | methanol          | <sup>3</sup>     |
| N-TiO <sub>2</sub> /Pt                                                                             | 570                                                                                     | 500-W Xe lamp                                                    | methanol          | <sup>4</sup>     |
| H <sub>2</sub> PtCl <sub>6</sub> /Copper–Organic Framework                                         | 32                                                                                      | 200-W Xe lamp (wavelength: 320-780 nm)                           | methanol          | <sup>5</sup>     |
| Pt–Co/g–C <sub>3</sub> N <sub>4</sub>                                                              | 61                                                                                      | 300-W Xe lamp (wavelength > 300 nm)                              | Not used          | <sup>6</sup>     |
| Rh/La:SrTiO <sub>3</sub>                                                                           | 280 (0.037 %)                                                                           | 300-W Xe lamp with cut-off filter (wavelength > 420 nm)          | methanol          | <sup>7</sup>     |

<sup>a</sup>For other cases the STH efficiencies were not reported

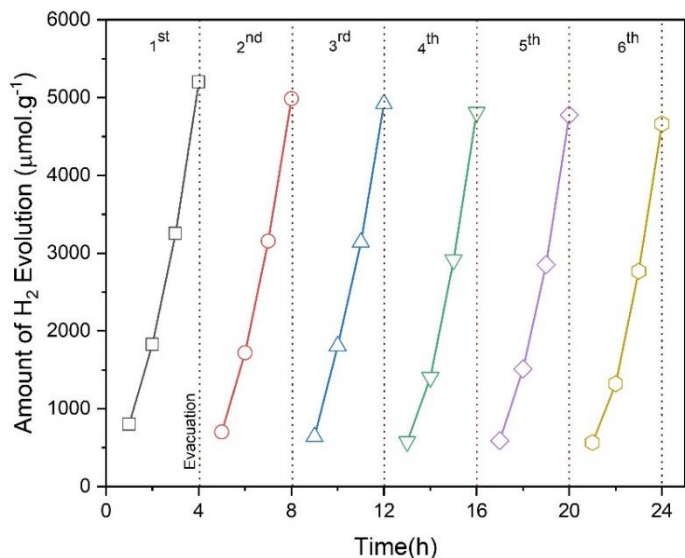

**Figure S7:** Stability test of H<sub>2</sub> evolution for SrTiO<sub>3</sub>/Bi<sub>4</sub>Ti<sub>3</sub>O<sub>12</sub> nanoheterostructural platelets obtained after 6-hour hydrothermal reaction (SrTiO<sub>3</sub>:Bi<sub>4</sub>Ti<sub>3</sub>O<sub>12</sub>=60:40). After every 4 h of reaction, the formed H<sub>2</sub> was evacuated.

### Calculation of the band-gap energy:

The band-gap energies ( $E_g$ ) of the constituents were calculated using the well-known Tauc method from the UV-VIS diffuse reflectance spectra and Kubelka-Munk function ( $F(R)$ ) by means of the following equation:<sup>8</sup>

$$F(R) = \frac{K}{S} = \frac{(1-R)^2}{2R}$$

where  $K$  and  $S$  are the absorption and scattering coefficients, respectively, and  $R=R_{\text{sample}}/R_{\text{standard}}$ .

Combination of  $F(R)$  into Tauc method provides:  $(F(R) \cdot hv)^{1/2} = B (hv - E_g)$

Here,  $h$  is the Planck constant,  $\nu$  is the incident frequency and  $B$  is a constant.<sup>8</sup> Figure S6 shows the

$(F(R) \cdot hv)^{1/2}$  versus  $hv$  plots. The band gaps ( $E_g$ ) of SrTiO<sub>3</sub> and Bi<sub>4</sub>Ti<sub>3</sub>O<sub>12</sub>, which were determined by extrapolation of the linear part of the function at  $F(R)=0$ , are 3.23 eV and 3.16 eV, respectively.

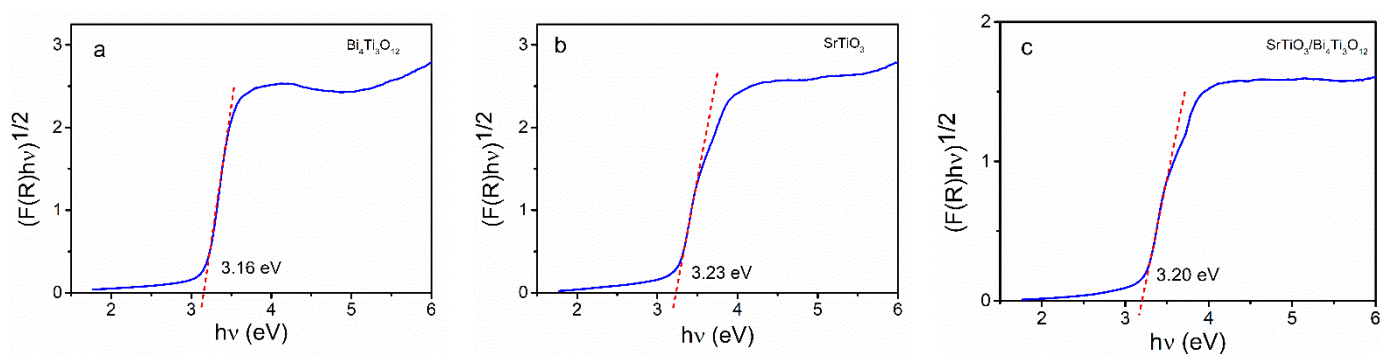

**Figure S8:** Determination of the band-gap energy from the Tauc plot for (a) Bi<sub>4</sub>Ti<sub>3</sub>O<sub>12</sub>, (b) SrTiO<sub>3</sub> and (c) SrTiO<sub>3</sub>/Bi<sub>4</sub>Ti<sub>3</sub>O<sub>12</sub> platelets.

## Calculation of the position of the conduction band ( $E_{CB}$ ) and valance band ( $E_{VB}$ ) energies:

The  $E_{CB}$  and  $E_{VB}$  are calculated using the following empirical formulas:<sup>9-11</sup>

$$E_{CB} = \chi_{mol} - E_e - 0.5E_g \quad [1]$$

$$E_{VB} = E_{CB} + E_g \quad [2]$$

Here,  $E_e$  is the free-electron energy vs. hydrogen (4.5 eV) and  $\chi_{mol}$  is the geometric mean of Mulliken's electron negativities of constituent atoms, calculated according to the following equation:<sup>10</sup>

$$\chi_{mol} = [\chi_A^a \cdot \chi_B^b \cdot \chi_C^c]^{\frac{1}{a+b+c}}$$

where the molecular formula is  $A_aB_bC_c$ .  $\chi_A$  ( $\chi_B$ ,  $\chi_C$ ) is Mulliken's absolute electronegativity of the corresponding atom (in eV) and it is defined as the arithmetic mean of the electron affinity and the first ionization energy of that atom.<sup>12,13</sup> For  $SrTiO_3$  and  $Bi_4Ti_3O_{12}$  the calculations give  $\chi_{SrTiO_3}=5.32$  and  $\chi_{Bi_4Ti_3O_{12}}=5.87$ . Considering the calculated values for  $\chi_{SrTiO_3}$  (5,32) and  $\chi_{Bi_4Ti_3O_{12}}$  (5,87), the  $E_{CB}$  and  $E_{VB}$  of  $SrTiO_3$  were determined to be -0.80 eV and 2.43 eV, while for  $Bi_4Ti_3O_{12}$  the calculations revealed  $E_{CB}=-0.21$  eV and  $E_{VB}=2.95$  eV, respectively.

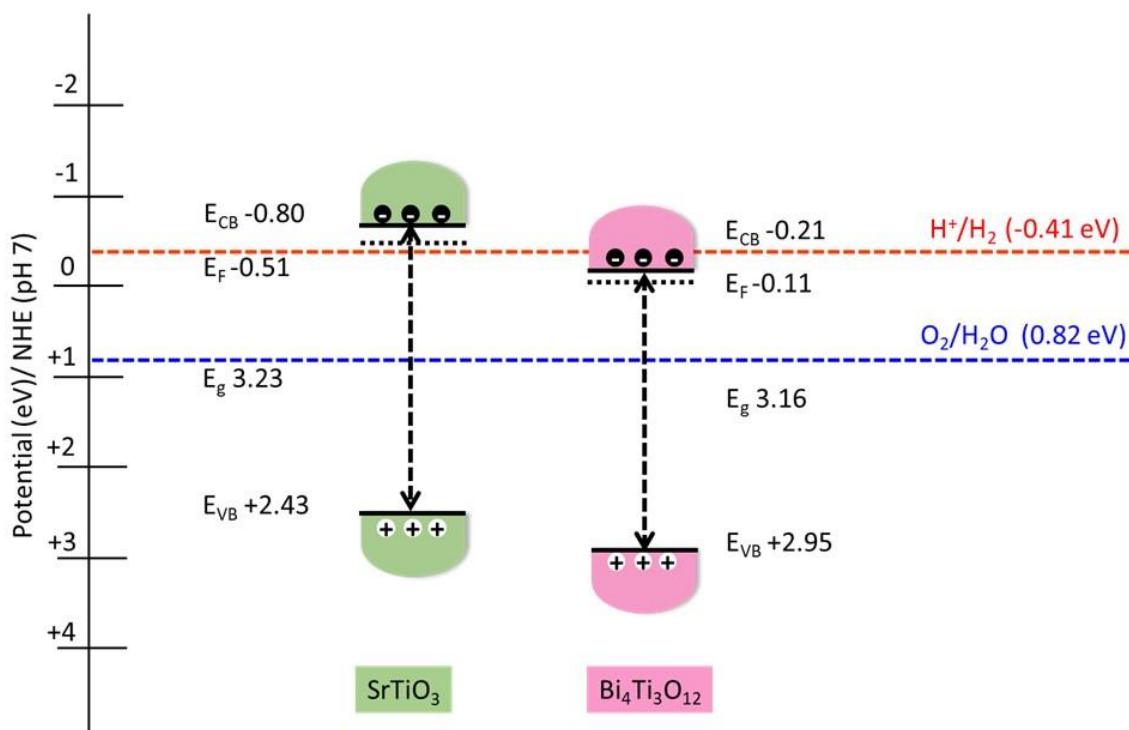

**Figure S9:** Band structure of  $SrTiO_3$  and  $Bi_4Ti_3O_{12}$



### Calculation of the solar-to-hydrogen (STH) efficiency:

$$STH (\%) = \frac{r_{H_2} \times \Delta G_{H_2O}}{P_{Sun} \times S} \times 100$$

Here,  $r_{H_2}$ ,  $\Delta G_{H_2O}$ ,  $P_{sun}$  and  $S$  represent the  $H_2$  production rate, the reaction Gibbs free energy (237 kJ/mol), the light energy flux ( $1.0 \times 10^3 \text{ W m}^{-2}$ ) and irradiation area ( $9 \text{ cm}^2$ ), respectively.

**Table S3: Comparison of solar-to-hydrogen (STH) efficiencies for SrTiO<sub>3</sub>-based photocatalytic H<sub>2</sub> evolution**

| Catalyst                                                                                          | STH (%)     | Irradiation source              | Reference        |
|---------------------------------------------------------------------------------------------------|-------------|---------------------------------|------------------|
| Rh/La:SrTiO <sub>3</sub>                                                                          | 0.037       | 300-W Xe lamp                   | 7                |
| SrTiO <sub>3</sub> :La, Rh and BiVO <sub>4</sub> :Mo embedded into Au layer                       | 1.1         | 300-W Xenon lamp                | 14               |
| RhCrO <sub>x</sub> / SrTiO <sub>3</sub> :Al                                                       | 0.4         | 300-W Xenon lamp                | 15               |
| Rh <sub>2-y</sub> Cr <sub>y</sub> O <sub>3</sub> loaded Al:SrTiO <sub>3</sub>                     | 0.11        | Xe lamp (wattage not specified) | 16               |
| TiO <sub>2</sub> /CoOOH/RhCrO <sub>x</sub> /SrTiO <sub>3</sub> :Al                                | 0.4         | 300-W Xenon lamp                | 17               |
| Rh/Cr <sub>2</sub> O <sub>3</sub> /CoOOH loaded SrTiO <sub>3</sub> :Al                            | 0.65        | 300-W Xenon lamp                | 18               |
| <b>SrTiO<sub>3</sub>/Bi<sub>4</sub>Ti<sub>3</sub>O<sub>12</sub> nanoheterostructural platelet</b> | <b>0.19</b> | <b>300-W Xenon lamp</b>         | <b>This work</b> |

## Supporting information references:

- (1) Zhao, Z.; Willard, E. J.; Li, H.; Wu, Z.; Castro, R. H. R.; Osterloh, F. E. Aluminum Enhances Photochemical Charge Separation in Strontium Titanate Nanocrystal Photocatalysts for Overall Water Splitting. *J. Mater. Chem. A* **2018**, *6* (33), 16170–16176. <https://doi.org/10.1039/c8ta05885g>.
- (2) Kuang, Q.; Yang, S. Template Synthesis of Single-Crystal-like Porous SrTiO<sub>3</sub> Nanocube Assemblies and Their Enhanced Photocatalytic Hydrogen Evolution. *ACS Appl. Mater. Interfaces* **2013**, *5* (9), 3683–3690. <https://doi.org/10.1021/am400254n>.
- (3) Puangpetch, T.; Sreethawong, T.; Yoshikawa, S.; Chavadej, S. Hydrogen Production from Photocatalytic Water Splitting over Mesoporous-Assembled SrTiO<sub>3</sub> Nanocrystal-Based Photocatalysts. *J. Mol. Catal. A Chem.* **2009**, *312* (1–2), 97–106. <https://doi.org/10.1016/j.molcata.2009.07.012>.
- (4) Huang, B. S.; Wey, M. Y. Properties and H<sub>2</sub> Production Ability of Pt Photodeposited on the Anatase Phase Transition of Nitrogen-Doped Titanium Dioxide. *Int. J. Hydrogen Energy* **2011**, *36* (16), 9479–9486. <https://doi.org/10.1016/j.ijhydene.2011.05.064>.
- (5) Wu, Z. L.; Wang, C. H.; Zhao, B.; Dong, J.; Lu, F.; Wang, W. H.; Wang, W. C.; Wu, G. J.; Cui, J. Z.; Cheng, P. A Semi-Conductive Copper-Organic Framework with Two Types of Photocatalytic Activity. *Angew. Chemie - Int. Ed.* **2016**, *55* (16), 4938–4942. <https://doi.org/10.1002/anie.201508325>.
- (6) Zhang, G.; Lan, Z. A.; Lin, L.; Lin, S.; Wang, X. Overall Water Splitting by Pt/g-C<sub>3</sub>N<sub>4</sub> Photocatalysts without Using Sacrificial Agents. *Chem. Sci.* **2016**, *7* (5), 3062–3066. <https://doi.org/10.1039/c5sc04572j>.
- (7) Wang, Q.; Hisatomi, T.; Ma, S. S. K.; Li, Y.; Domen, K. Core/Shell Structured La- and Rh-Codoped SrTiO<sub>3</sub> as a Hydrogen Evolution Photocatalyst in Z-Scheme Overall Water Splitting under Visible Light Irradiation. *Chem. Mater.* **2014**, *26* (14), 4144–4150. <https://doi.org/10.1021/cm5011983>.
- (8) Makuła, P.; Pacia, M.; Macyk, W. How To Correctly Determine the Band Gap Energy of Modified Semiconductor Photocatalysts Based on UV-Vis Spectra. *J. Phys. Chem. Lett.* **2018**, *9* (23), 6814–6817. <https://doi.org/10.1021/acs.jpcclett.8b02892>.
- (9) Lin, X. P.; Huang, F. Q.; Wang, W. D.; Zhang, K. L. A Novel Photocatalyst BiSbO<sub>4</sub> for Degradation of Methylene Blue. *Appl. Catal. A Gen.* **2006**, *307* (2), 257–262. <https://doi.org/10.1016/j.apcata.2006.03.057>.
- (10) Mousavi, M.; Habibi-Yangjeh, A.; Abitorabi, M. Fabrication of Novel Magnetically Separable Nanocomposites Using Graphitic Carbon Nitride, Silver Phosphate and Silver Chloride and Their Applications in Photocatalytic Removal of Different Pollutants Using Visible-Light Irradiation. *J. Colloid Interface Sci.* **2016**, *480*, 218–231. <https://doi.org/10.1016/j.jcis.2016.07.021>.
- (11) Cao, T.; Li, Y.; Wang, C.; Zhang, Z.; Zhang, M.; Shao, C.; Liu, Y. Bi<sub>4</sub>Ti<sub>3</sub>O<sub>12</sub> Nanosheets/TiO<sub>2</sub> Submicron Fibers Heterostructures: In Situ Fabrication and High Visible Light Photocatalytic Activity. *J. Mater. Chem.* **2011**, *21* (19), 6922–6927. <https://doi.org/10.1039/c1jm10343a>.
- (12) Mulliken, R. S. A New Electroaffinity Scale; Together with Data on Valence States and on Valence Ionization Potentials and Electron Affinities. *J. Chem. Phys.* **1934**, *2* (11), 782–793. <https://doi.org/10.1063/1.1749394>.
- (13) Mulliken, R. S. Electronic Structures of Molecules XI. Electroaffinity, Molecular Orbitals and Dipole Moments. *J. Chem. Phys.* **1935**, *3* (9), 573–585. <https://doi.org/10.1063/1.1749731>.
- (14) Wang, Q.; Hisatomi, T.; Jia, Q.; Tokudome, H.; Zhong, M.; Wang, C.; Pan, Z.; Takata, T.; Nakabayashi, M.; Shibata, N.; Li, Y.; Sharp, I. D.; Kudo, A.; Yamada, T.; Domen, K. Scalable Water

Splitting on Particulate Photocatalyst Sheets with a Solar-to-Hydrogen Energy Conversion Efficiency Exceeding 1%. *Nat. Mater.* **2016**, *15* (6), 611–615. <https://doi.org/10.1038/nmat4589>.

- (15) Goto, Y.; Hisatomi, T.; Wang, Q.; Higashi, T.; Ishikiriya, K.; Maeda, T.; Sakata, Y.; Okunaka, S.; Tokudome, H.; Katayama, M.; Akiyama, S.; Nishiyama, H.; Inoue, Y.; Takewaki, T.; Setoyama, T.; Minegishi, T.; Takata, T.; Yamada, T.; Domen, K. A Particulate Photocatalyst Water-Splitting Panel for Large-Scale Solar Hydrogen Generation. *Joule* **2018**, *2* (3), 509–520. <https://doi.org/10.1016/j.joule.2017.12.009>.
- (16) Zhao, Z.; Goncalves, R. V.; Barman, S. K.; Willard, E. J.; Byle, E.; Perry, R.; Wu, Z.; Huda, M. N.; Moulé, A. J.; Osterloh, F. E. Electronic Structure Basis for Enhanced Overall Water Splitting Photocatalysis with Aluminum Doped SrTiO<sub>3</sub> in Natural Sunlight. *Energy Environ. Sci.* **2019**, *12* (4), 1385–1395. <https://doi.org/10.1039/c9ee00310j>.
- (17) Lyu, H.; Hisatomi, T.; Goto, Y.; Yoshida, M.; Higashi, T.; Katayama, M.; Takata, T.; Minegishi, T.; Nishiyama, H.; Yamada, T.; Sakata, Y.; Asakura, K.; Domen, K. An Al-Doped SrTiO<sub>3</sub> Photocatalyst Maintaining Sunlight-Driven Overall Water Splitting Activity for over 1000 h of Constant Illumination. *Chem. Sci.* **2019**, *10* (11), 3196–3201. <https://doi.org/10.1039/c8sc05757e>.
- (18) Takata, T.; Jiang, J.; Sakata, Y.; Nakabayashi, M.; Shibata, N.; Nandal, V.; Seki, K.; Hisatomi, T.; Domen, K. Photocatalytic Water Splitting with a Quantum Efficiency of Almost Unity. *Nature* **2020**, *581* (7809), 411–414. <https://doi.org/10.1038/s41586-020-2278-9>.
